# Supplementary material for: Ultra-sensitive detection of PFASs using surface enhanced Raman scattering and machine learning: a promising approach for environmental analysis
Source: Royal Society of Chemistry journal article supplement (doi:10.1039/d4sd00052h), 2024-01-01
Supplement: d4sd00052h1.pdf [file d4sd00052h1.pdf]

## Supporting Information

### **Ultra-Sensitive Detection of PFASs using Surface Enhanced Raman Scattering: A Promising Approach for Environmental Analysis**

Joshua C. Rothstein,<sup>a</sup> Jiaheng Cui,<sup>b</sup> Yanjun Yang,<sup>b</sup> Xianyan Chen,<sup>c</sup> and Yiping Zhao<sup>a</sup>

<sup>a</sup> Department of Physics and Astronomy, Franklin College of Arts and Sciences

<sup>b</sup> School of Electrical and Computer Engineering, College of Engineering

<sup>c</sup> Department of Epidemiology & Biostatistics, College of Public Health

The University of Georgia, Athens, GA, USA 30602

## S1. SEM image of an AgNR substrate

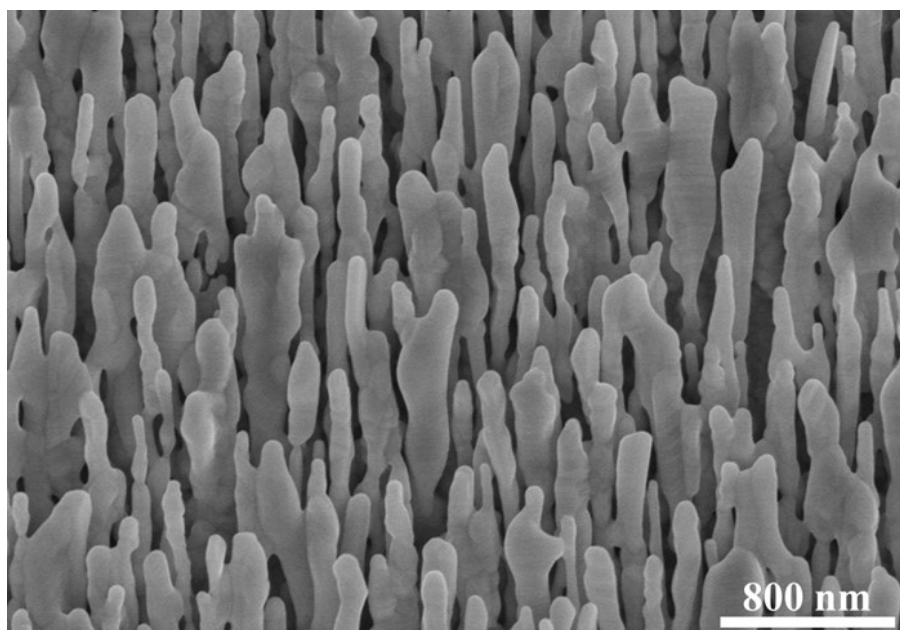

Fig. S1 A typical SEM image of the AgNR substrate.

## S2. Optimization of MCH functionalization

To determine the optimal concentration of MCH, the MCH solution was diluted to the following 8 concentrations: 6, 15, 30, 60, 150, 240, 300, and 360  $\mu\text{M}$ , respectively. 20  $\mu\text{L}$  of each solution was pipetted to an AgNR well and incubated for an hour. Then, each well was rinsed with DI water and air-dried. 20 SERS spectra were taken from each well at each concentration with a laser power of 14.5 mW, a 20 $\times$  objective lens, and 10 s acquisition time. The average spectra of these concentrations are shown in **Figure S2a**. The average peak intensities, along with their corresponding standard deviations at  $\Delta\nu = 698, 869,$  and  $1087 \text{ cm}^{-1}$  were analyzed, as shown in **Figures S2b-d**.

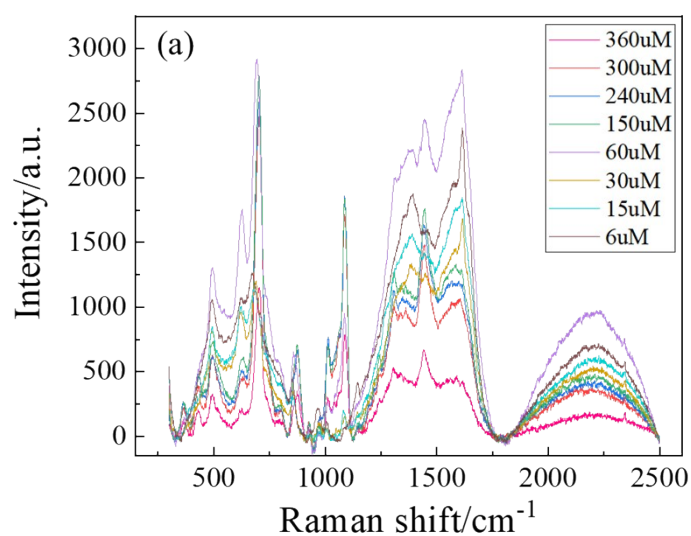

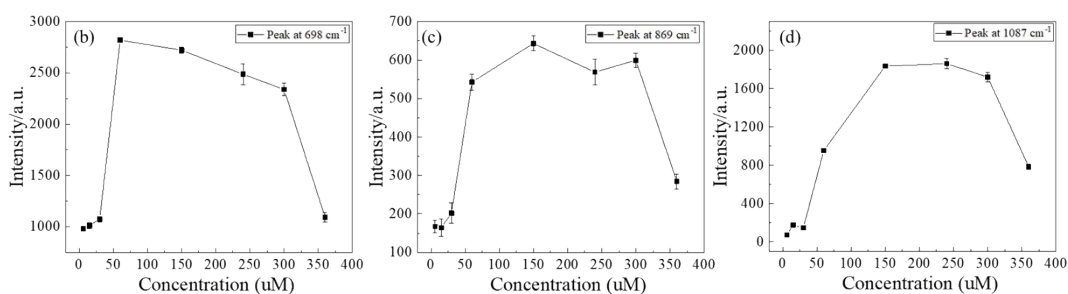

**Fig. S2** (a) Baseline removed average spectra of MCH on AgNR at 8 concentrations. The following graphs track peak intensities of each concentration at (b)  $\Delta\nu = 698 \text{ cm}^{-1}$ , (c)  $\Delta\nu = 869 \text{ cm}^{-1}$ , and (d)  $\Delta\nu = 1087 \text{ cm}^{-1}$ .

### S3. The comparison of the experimental and DFT Raman spectra of selected PFAS

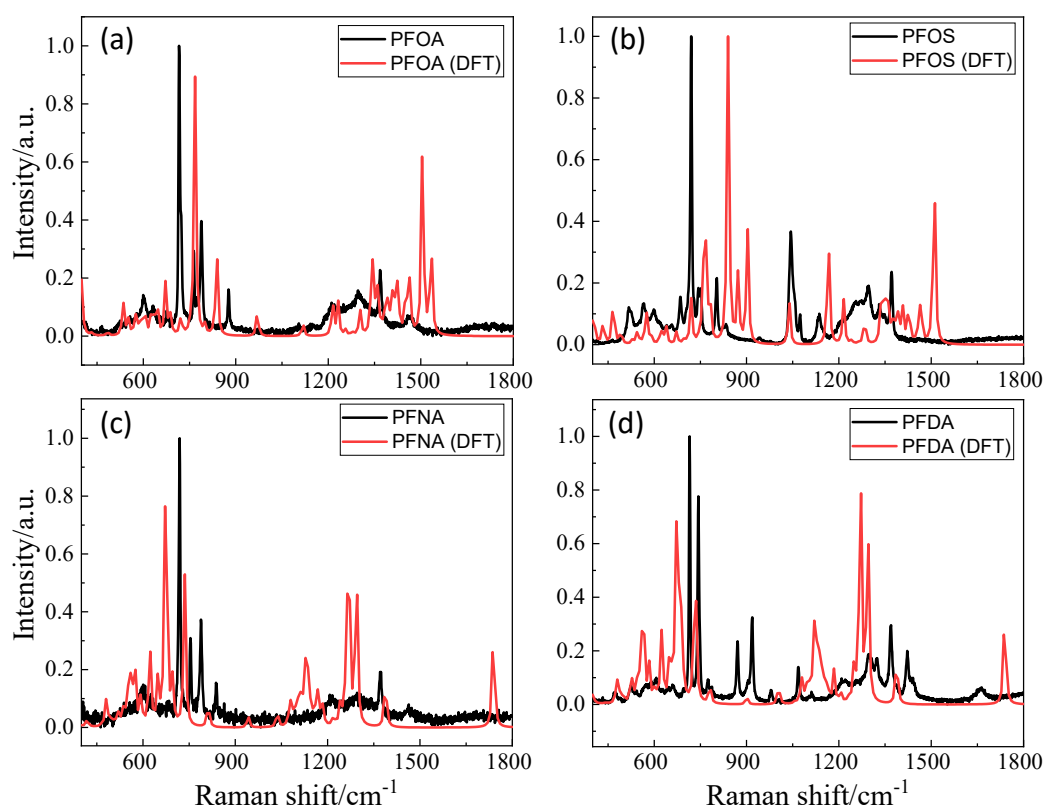

**Fig. S3** Comparison of experimental obtained SERS spectra and those calculated using DFT. The DFT results are adapted from Chen et al.<sup>1</sup>

### S4. List of peaks of PFAS SERS spectra

**Table S1.** A list of peaks of SERS spectra from five  $10^3$  ppt PFAS compounds in methanol as well as from an AgNR substrate, as shown in **Figure 3**.

| HFPO-DA | PFDA | PFNA | PFOS | PFOA | AgNR |
|---------|------|------|------|------|------|
| 745     | 745  | 745  | 745  | 745  |      |
| 805     | 805  | 805  | 805  | 805  | 805  |
| 927     | 927  | 927  | 927  | 927  | 927  |
| 999     | 999  | 999  | 999  | 999  | 999  |
| 1136    | 1136 | 1136 | 1136 | 1136 | 1136 |
| 1271    | 1271 | 1271 | 1271 | 1271 |      |

|      |      |      |      |      |      |
|------|------|------|------|------|------|
| 1404 | 1404 | 1404 | 1404 | 1404 | 1404 |
| 1603 | 1603 | 1603 | 1603 | 1603 | 1603 |

## S5. Cosine similarity matrix of PFAS SERS spectra

**Table S2.** Cosine similarity matrix between the spectra of the AgNR background and the PFAS samples (PFOA, PFOS, PFNA, PFDA, and HFPO-DA) shown in **Figure 3a**.

|         | AgNR  | PFOA  | PFOS  | PFNA  | PFDA  | HFPO-DA |
|---------|-------|-------|-------|-------|-------|---------|
| AgNR    | 1.000 | 0.643 | 0.618 | 0.618 | 0.659 | 0.619   |
| PFOA    | 0.643 | 1.000 | 0.988 | 0.985 | 0.966 | 0.947   |
| PFOS    | 0.618 | 0.988 | 1.000 | 0.993 | 0.982 | 0.967   |
| PFNA    | 0.618 | 0.985 | 0.993 | 1.000 | 0.992 | 0.979   |
| PFDA    | 0.659 | 0.966 | 0.982 | 0.992 | 1.000 | 0.990   |
| HFPO-DA | 0.619 | 0.947 | 0.967 | 0.979 | 0.990 | 1.000   |

## S6. List of peaks of PFOA SERS spectra

**Table S3.** A list of peaks of SERS spectra for PFOA that appears throughout the paper. **Figure 2** presents the experimental Raman spectra of PFOA powder. **Figure 3a** shows the first experimental set of SERS spectra of PFOA with methanol, fixed at  $10^3$  ppt. **Figure 4a** displays the second experimental set of SERS spectra of PFOA with methanol, containing the concentrations  $10^0$ ,  $10^1$ ,  $10^3$ ,  $10^6$ ,  $10^7$ , and  $10^8$  ppt. The highlighted cells represent the characteristic peaks shown in **Figure 4b**. The last column indicates the characteristic peaks of the reference, i.e., methanol, in **Figure 4b**.

| PFOA   |         |         |                      |
|--------|---------|---------|----------------------|
| Fig. 2 | Fig. 3a | Fig. 4a | Reference (methanol) |
|        |         | 333     |                      |
|        |         |         | 435                  |
|        |         | 485     |                      |
| 600    |         | 604     |                      |
| 630    |         |         |                      |
| 660    |         |         |                      |
| 675    |         | 682     | 682                  |
| 715    |         |         |                      |
|        |         |         |                      |
| 763    | 754     | 760     | 764                  |
| 788    |         |         |                      |
|        | 805     |         |                      |
|        |         | 814     | 816                  |
| 873    |         | 878     | 881                  |
|        | 927     | 934     | 934                  |
|        | 999     | 1005    | 1005                 |
|        |         | 1053    | 1053                 |
|        | 1136    | 1136    |                      |
|        | 1271    |         |                      |
| 1296   |         |         |                      |
|        |         |         |                      |
| 1370   |         |         |                      |
|        | 1404    | 1403    | 1403                 |
|        |         | 1544    |                      |

|  |      |      |      |
|--|------|------|------|
|  | 1603 |      |      |
|  |      | 1642 | 1642 |

### S7. Cosine similarity matrix of PFOA SERS spectra

**Table S4.** Cosine similarity matrix between the reference spectrum and the spectra of different concentrations of PFOA shown in **Figure 4a**.

|                     | Reference | 10 <sup>0</sup> ppt | 10 <sup>1</sup> ppt | 10 <sup>3</sup> ppt | 10 <sup>6</sup> ppt | 10 <sup>7</sup> ppt | 10 <sup>8</sup> ppt |
|---------------------|-----------|---------------------|---------------------|---------------------|---------------------|---------------------|---------------------|
| Reference           | 1.000     | 0.778               | 0.717               | 0.775               | 0.713               | 0.734               | 0.774               |
| 10 <sup>0</sup> ppt | 0.778     | 1.000               | 0.970               | 0.996               | 0.961               | 0.977               | 0.969               |
| 10 <sup>1</sup> ppt | 0.717     | 0.970               | 1.000               | 0.978               | 0.998               | 0.998               | 0.932               |
| 10 <sup>3</sup> ppt | 0.775     | 0.996               | 0.978               | 1.000               | 0.970               | 0.983               | 0.961               |
| 10 <sup>6</sup> ppt | 0.713     | 0.961               | 0.998               | 0.970               | 1.000               | 0.996               | 0.919               |
| 10 <sup>7</sup> ppt | 0.734     | 0.977               | 0.998               | 0.983               | 0.996               | 1.000               | 0.947               |
| 10 <sup>8</sup> ppt | 0.774     | 0.969               | 0.932               | 0.961               | 0.919               | 0.947               | 1.000               |

### S8. Peak locations and confusion matrix of PFAS on cysteine-modified AgNR substrates

**Table S5.** Center positions of the distinct peaks identified in the SERS spectra of PFOS and PFOA, and their presence in each spectrum shown in **Figure 5**.

| Wavenumber (cm <sup>-1</sup> ) | PFOA                |                     |                      | PFOS                |                     |                      | Water |
|--------------------------------|---------------------|---------------------|----------------------|---------------------|---------------------|----------------------|-------|
|                                | 10 <sup>8</sup> ppt | 10 <sup>4</sup> ppt | 10 <sup>-2</sup> ppt | 10 <sup>8</sup> ppt | 10 <sup>4</sup> ppt | 10 <sup>-2</sup> ppt |       |
| -                              |                     |                     |                      |                     |                     |                      | -     |
| 502                            | √                   | √                   | √                    | √                   | √                   | √                    | √     |
| 672                            | √                   | √                   | √                    | √                   | √                   | √                    | √     |
| 724                            | √                   | √                   | √                    |                     |                     |                      |       |
| 750                            | √                   | √                   | √                    | √                   | √                   | √                    | √     |
| 840                            | √                   |                     |                      |                     |                     |                      |       |
| 857                            |                     | √                   | √                    | √                   | √                   | √                    | √     |
| 904                            | √                   |                     |                      |                     |                     |                      |       |
| 915                            |                     |                     |                      | √                   |                     |                      | √     |
| 1050                           | √                   | √                   | √                    | √                   | √                   | √                    | √     |
| 1164                           | √                   | √                   | √                    | √                   | √                   | √                    | √     |
| 1230                           | √                   | √                   | √                    | √                   | √                   | √                    | √     |
| 1304                           | √                   | √                   | √                    | √                   | √                   | √                    | √     |
| 1354                           | √                   | √                   | √                    |                     |                     |                      |       |
| 1399                           | √                   | √                   | √                    | √                   | √                   | √                    | √     |
| 1520                           |                     |                     |                      | √                   | √                   | √                    |       |

|      |   |   |   |   |   |   |   |
|------|---|---|---|---|---|---|---|
| 1576 | √ | √ | √ |   |   |   |   |
| 1622 | √ | √ | √ | √ | √ | √ | √ |

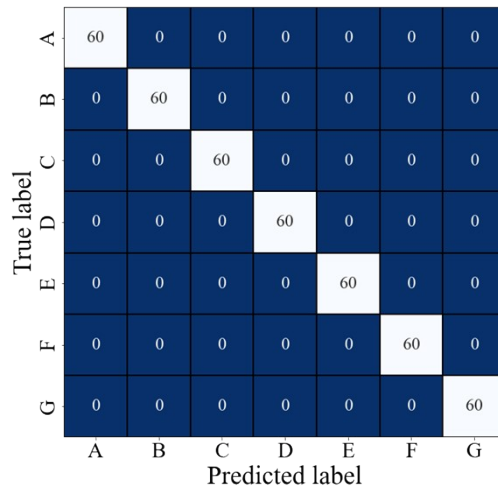

**Fig. S4** The confusion matrix from an SVM model to process all spectra in **Figure 5**. Labels A, B, and C represent  $10^8$ ,  $10^4$ , and  $10^{-2}$  ppt PFOA; D, E, and F refer to  $10^8$ ,  $10^4$ , and  $10^{-2}$  ppt PFOS; and G is water on cysteine-modified AgNR substrates.

### S9. Peak intensities of concentration-dependent baseline removed spectra

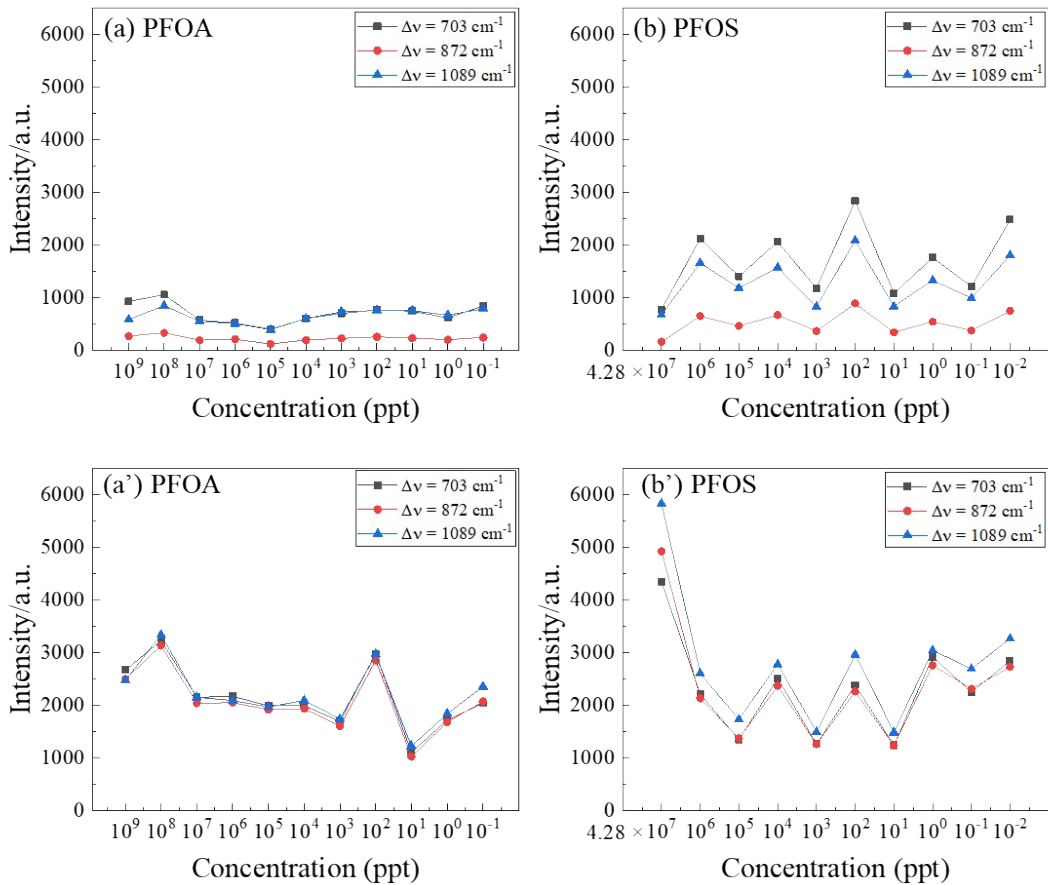

**Fig. S5** The semi-log plot of the peak intensities at  $\Delta\nu = 703$ ,  $872$ , and  $1089$   $\text{cm}^{-1}$  versus concentration under these conditions: (a) PFOA with global baseline removal, (b) PFOS with global baseline removal; (a') PFOA with local baseline removal, (b') PFOS with local baseline removal.

## References

1. Y. Chen, Y. Yang, J. Cui, H. Zhang and Y. Zhao, *Journal of Hazardous Materials*, 2024, **465**, 133260.
